# Supplementary material for: A high voltage solid state symmetric supercapacitor based on graphene–polyoxometalate hybrid electrodes with a hydroquinone doped hybrid gel-electrolyte
Source: Royal Society of Chemistry journal article supplement (doi:10.1039/c5ta05660h), 2015-01-01
Supplement: c5ta05660h1.pdf [file c5ta05660h1.pdf]

## Supporting information

High voltage solid state symmetric supercapacitor based on  
graphene-polyoxometalate hybrid electrode with hydroquinone  
doped hybrid gel electrolyte

*Deepak P. Dubal,<sup>a\*</sup> Jullieth Suarez-Guevara,<sup>a</sup> Dino Tonti,<sup>b</sup> Eduardo Enciso,<sup>c</sup> Pedro  
Gomez-Romero<sup>a\*\*</sup>*

<sup>a</sup>Catalan Institute of Nanoscience and Nanotechnology (ICN2), CSIC and The  
Barcelona Institute of Science and Technology, Campus UAB, Bellaterra, 08193  
Barcelona, Spain

<sup>b</sup>ICMAB (CSIC), Campus UAB E-08193 Bellaterra, Barcelona, Spain

<sup>c</sup>Departamento de Química Física I, Facultad de Ciencias Químicas, Universidad  
Complutense de Madrid (UCM) Campus Moncloa, Madrid, Spain

## Supporting information S1

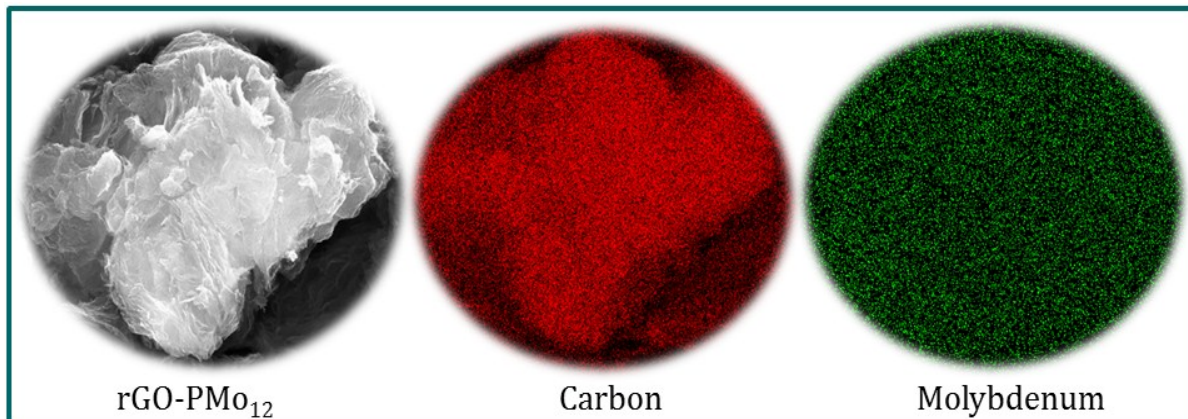

**Figure S1** Scanning electron micrograph (SEM) with EDS mapping of rGO-PMo<sub>12</sub> sample confirming the presence of carbon and molybdenum.

## Supporting information S2

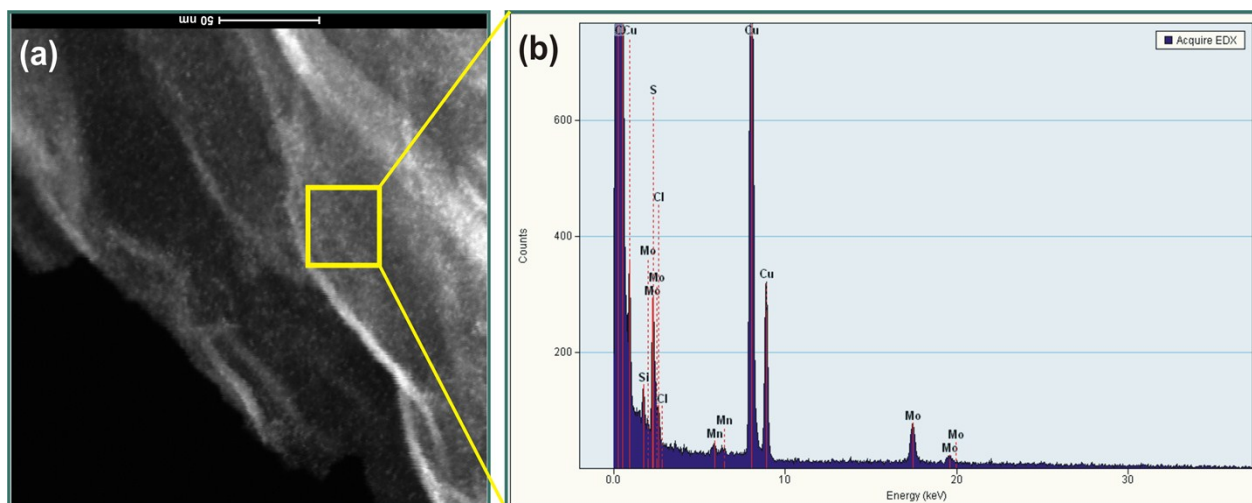

**Figure S2** (a) Scanning transmission electron micrograph (STEM) with corresponding EDS spectrum of rGO-PMo<sub>12</sub> hybrid material

### Supporting information S3

#### Calculations:

The cell (device) capacitance ( $C$ ) and volumetric capacitance of the symmetric devices were calculated from their CVs according to the following equation:

$$C_{cell} = \frac{Q}{\Delta V} \quad (1)$$

$$C_A = \frac{Q}{A \times \Delta V} \quad \text{and} \quad C_V = \frac{Q}{V \times \Delta V} \quad (2)$$

where,  $C_A$  and  $C_V$  are areal and volumetric capacitances, respectively.  $Q$  (C) is the average charge during the charging and discharging process,  $V$  is the volume ( $\text{cm}^3$ ) of the whole device (The area and thickness of our symmetric cells is about  $0.785 \text{ cm}^2$  (Area,  $A = \pi r^2$ ,  $3.14 \times (0.5)^2$ ) and  $0.088 \text{ cm}$ . Hence, the whole volume of device is about  $0.069 \text{ cm}^3$ ,  $\Delta V$  (V) is the voltage window. It is worth mentioning that the volumetric capacitances were calculated taking into account the volume of the device stack. This includes the active material, the flexible substrate and the separator with electrolyte.

Alternatively, the cell capacitance ( $C_{cell}$ ), areal ( $C_A$ ) and volumetric ( $C_V$ ) capacitance of the electrode ( $C_V$ ) was estimated from the slope of the discharge curve using the following equations:

$$C_{cell} = \frac{I \times \Delta t}{\Delta V} \quad (4)$$

$$C_A = \frac{I \times \Delta t}{A \times \Delta V} \quad \text{and} \quad C_V = \frac{I \times \Delta t}{V \times \Delta V} \quad (5)$$

where  $I$  is the applied current,  $V$  is the volume ( $\text{cm}^3$ ) of the whole device (the whole volume of our device is about  $0.069 \text{ cm}^3$ ),  $\Delta t$  is the discharging time,  $\Delta V$  (V) is the voltage window.

Volumetric energy ( $E$ ,  $\text{Wh/cm}^3$ ) and power density ( $P$ ,  $\text{W/cm}^3$ ) of the devices were obtained from the following equations:

$$E = \frac{1}{2 \times 3600} C_v \Delta V^2 \quad (6)$$

$$P = \frac{3600 \times E}{\Delta t} \quad (7)$$

where  $E$  ( $\text{Wh/cm}^3$ ) is the energy density,  $C_v$  is the volumetric capacitance obtained from Equation (5) and  $\Delta V$  (V) is the voltage window,  $P$  ( $\text{W/cm}^3$ ) is the power density.

### Supporting information S4

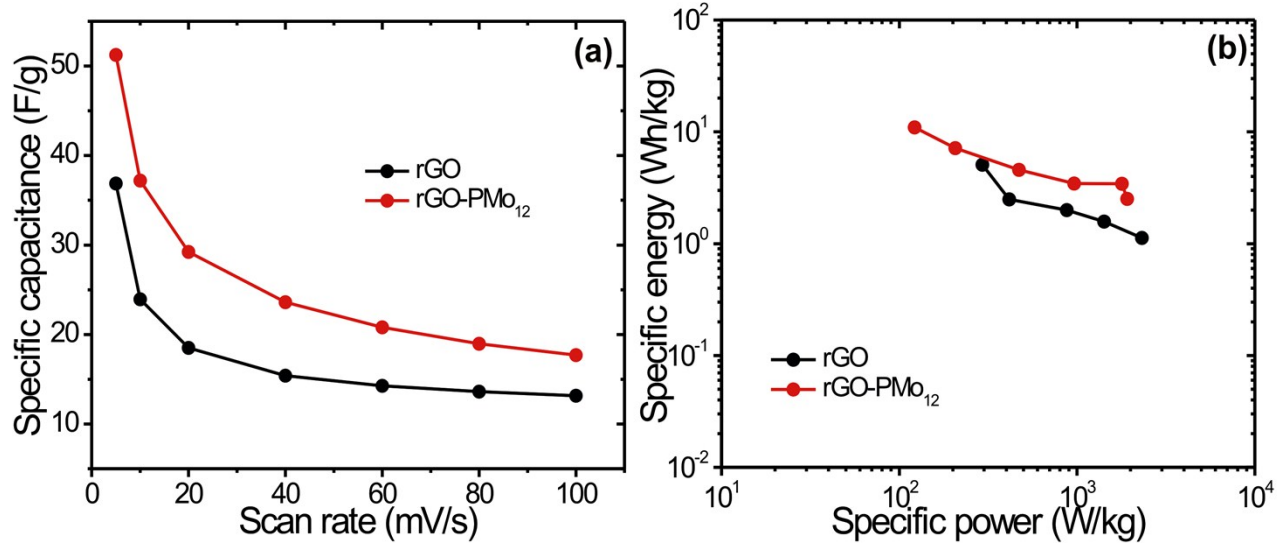

**Figure S4** (a) Variation of specific capacitance with scan rate and (b) gravimetric Ragone plot of rGO and rGO-PMo<sub>12</sub> symmetric cells, respectively

## Supporting information S5

### Comparison on supercapacitive values of POM as well as metal oxide based electrodes

| Electrode                                                                                                     | Device           | Electrolyte                    | Capacitance                                                    | Ref.                          |
|---------------------------------------------------------------------------------------------------------------|------------------|--------------------------------|----------------------------------------------------------------|-------------------------------|
| SWCNT-TBA-PV <sub>2</sub> Mo <sub>10</sub>                                                                    | Symmetric        | H <sub>2</sub> SO <sub>4</sub> | 317 mF/cm <sup>2</sup>                                         | [1]                           |
| H <sub>3</sub> PMo <sub>12</sub> O <sub>40</sub> /MWCNT                                                       | Symmetric        | H <sub>2</sub> SO <sub>4</sub> | 38 F/g                                                         | [2]                           |
| H <sub>3</sub> PMo <sub>12</sub> O <sub>40</sub> /PPy//H <sub>3</sub> PW <sub>12</sub> O <sub>40</sub> /PEDOT | Asymmetric       | H <sub>2</sub> SO <sub>4</sub> | 31 F/g                                                         | [3]                           |
| H <sub>3</sub> PMo <sub>12</sub> O <sub>40</sub> /PAni                                                        | Symmetric        | H <sub>2</sub> SO <sub>4</sub> | 195 mF/cm <sup>2</sup>                                         | [4]                           |
| PAni/SiW <sub>12</sub>                                                                                        | Symmetric        | H <sub>2</sub> SO <sub>4</sub> | 1.8 mF/cm <sup>2</sup>                                         | [5]                           |
| PAni/PW <sub>12</sub>                                                                                         | Symmetric        | H <sub>2</sub> SO <sub>4</sub> | 15 mF/cm <sup>2</sup>                                          | [5]                           |
| MnO <sub>2</sub> //Fe <sub>2</sub> O <sub>3</sub>                                                             | Asymmetric       | Gel-electrolyte                | 1.21 F/cm <sup>3</sup>                                         | [6]                           |
| ZnO@MnO <sub>2</sub>                                                                                          | Symmetric        | Gel-electrolyte                | 0.325 F/cm <sup>3</sup>                                        | [7]                           |
| TiN                                                                                                           | Symmetric        | Gel-electrolyte                | 0.33 F/cm <sup>3</sup>                                         | [8]                           |
| Graphene                                                                                                      | Symmetric        | Gel-electrolyte                | 0.42 F/cm <sup>3</sup>                                         | [9]                           |
| ZnO@MnO <sub>2</sub> //graphene                                                                               | Asymmetric       | Gel-electrolyte                | 0.52 F/cm <sup>3</sup>                                         | [10]                          |
| H-TiO <sub>2</sub> @MnO <sub>2</sub> //TiO <sub>2</sub> @C                                                    | Asymmetric       | Gel-electrolyte                | 0.70 F/cm <sup>3</sup>                                         | [11]                          |
| <i>rGO-PMo<sub>12</sub></i>                                                                                   | <i>Symmetric</i> | <i>Gel-electrolyte</i>         | <i>3.18 F/cm<sup>3</sup></i><br><i>(278 mF/cm<sup>2</sup>)</i> | <i>Present</i><br><i>work</i> |
| <i>rGO-PMo<sub>12</sub> with HQ doped gel</i>                                                                 | <i>Symmetric</i> | <i>Gel-electrolyte</i>         | <i>4.8 F/cm<sup>3</sup></i><br><i>(419 F/cm<sup>2</sup>)</i>   | <i>Present</i><br><i>work</i> |

### References

- [21] H. Y. Chen, R. Al-Oweini, J. Friedl, C. Y. Lee, L. Li, U. Kortz, U. Stimming, M. Srinivasan, *Nanoscale*, **2015**, 7, 7934-7941.
- [2] M. Skunik, M. Chojak, I. A. Rutkowska, P. J. Kulesza, *Electrochim. Acta*, **2008**, 53, 3862-3869.
- [3] G. M. Suppes, C. G. Cameron, M. S. Freund, *J. Electrochem. Soc.*, **2010**, 157,

A1030-A1034

- [4] P. Gomez-Romero, M. Chojak, A. Cuentas-Gallegos, J. A. Asensio, P. J. Kulesza, N. Casan-Pastor, M. Lira-Cantu, *Electrochem. Commun.*, **2003**, 5, 149-153
- [5] A. Cuentas-Gallegos, M. Lira-Cantu, N. Casan-Pastor, P. Gomez-Romero, *Adv. Funct. Mater.*, **2005**, 15, 1125-1133.
- [6] X. Lu, Y. Zeng, M. Yu, T. Zhai, C. Liang, S. Xie, M. Balogun, Y. Tong, *Adv. Mater.* **2014**, 26, 3148-3155.
- [7] P. Yang, X. Xiao, Y. Li, Y. Ding, P. Qiang, X. Tan, W. Mai, Z. Lin, W. Wu,; T. Li, H. Jin, P. Liu, J. Zhou, C. P. Wong, Z. L. Wang, *ACS Nano* **2013**, 7, 2617-2626
- [8] X. H. Lu, G. M. Wang, T. Zhai, M. H. Yu, S. L. Xie, Y. C. Ling, C. L. Liang, Y. X. Tong, Y. Li, *Nano Lett.* **2012**, 12, 5376-5381.
- [9] M. F. El-Kady, V. Strong, S. Dubin, R. B. Kaner, *Science* **2012**, 335, 1326-1330.
- [10] W. Zilong, Z. Zhu, J. Qiu, S. Yang, *J. Mater. Chem. C*, **2014**, 2, 1331-1336.
- [11] X. Lu, M. Yu, G. Wang, T. Zhai, S. Xie, Y. Ling, Y. Tong, Y. Li, *Adv. Mater.* **2013**, 25, 267-272.



### Supporting information S6

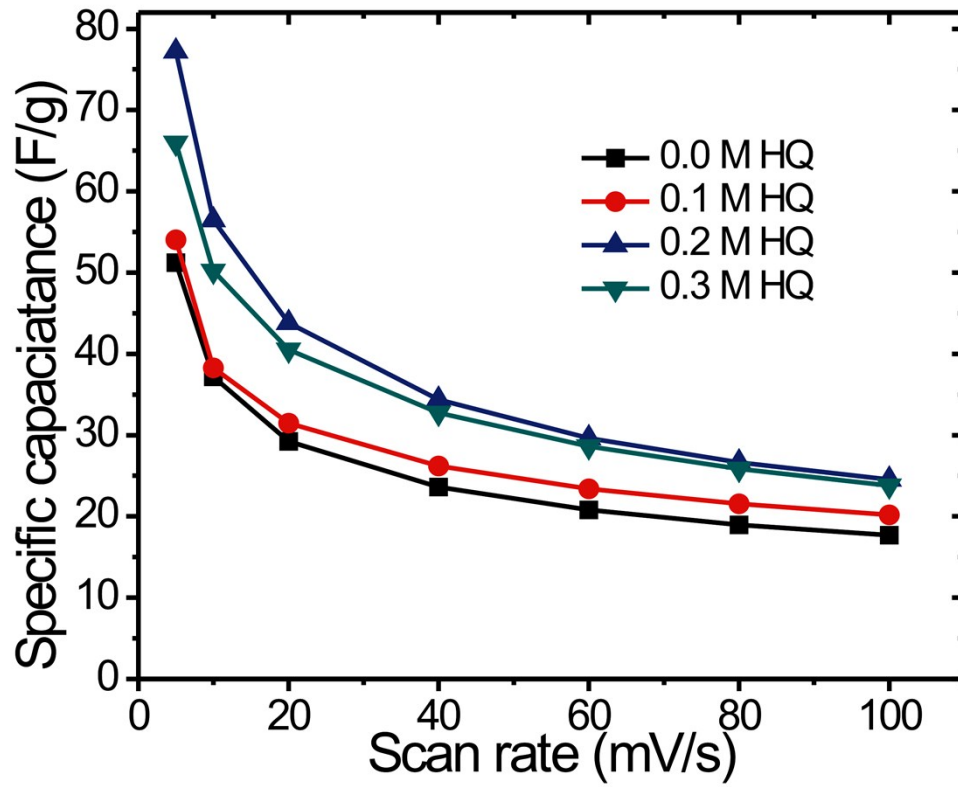

**Figure S6** Variation of specific capacitance with scan rate for rGO-PMo<sub>12</sub> symmetric cell at different concentrations of HQ doped gel-electrolyte.

### Supporting information S7

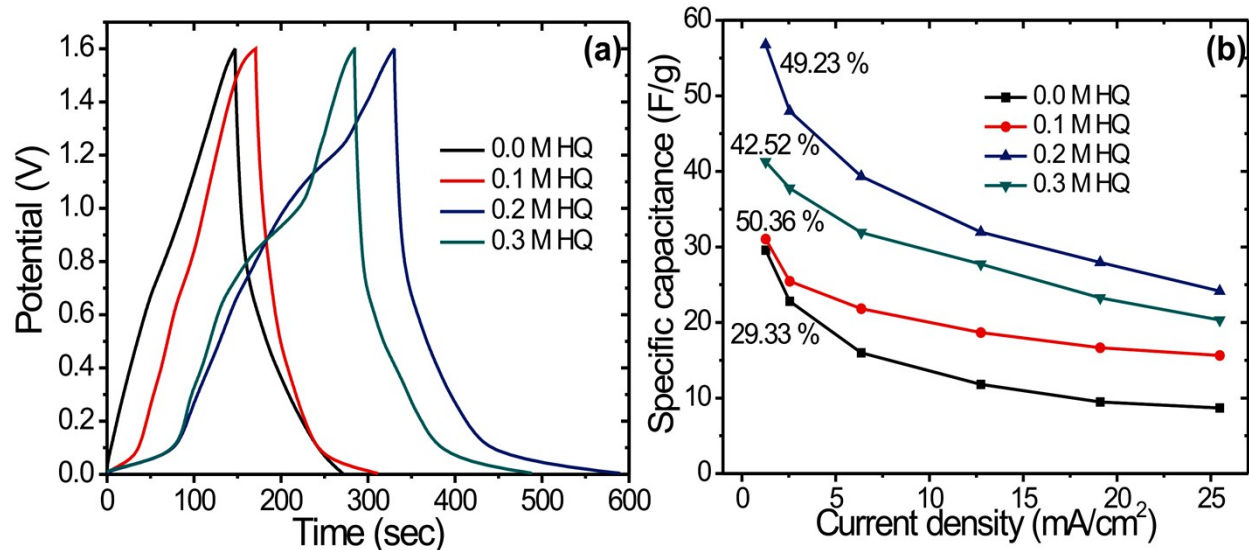

**Figure S7** (a) Galvanostatic charge/discharge curves of rGO-PMo<sub>12</sub> symmetric cell at different concentrations of HQ doped gel-electrolyte; (b) Variation of specific capacitance of rGO-PMo<sub>12</sub> cell with current density at different concentrations of HQ doped gel-electrolyte.
